1 **Title**

2 Incorporating uniparental markers and demographic information in kinship analysis

3 **Authors**

4 Jin-Xian Liu<sup>1,2,3\*</sup>, Meng-Yu Li<sup>1,2,3,4</sup>

5

6

7 **Affiliations**

8 <sup>1</sup> CAS Key Laboratory of Marine Ecology and Environmental Sciences, Institute of  
9 Oceanology, Chinese Academy of Sciences, Qingdao 266071, China.

10 <sup>2</sup>Laboratory for Marine Ecology and Environmental Science, Qingdao National  
11 Laboratory for Marine Science and Technology, Qingdao 266237, China.

12 <sup>3</sup>Center for Ocean Mega-Science, Chinese Academy of Sciences, Qingdao, 266071,  
13 China.

14 <sup>4</sup>University of Chinese Academy of Sciences, Beijing, China.

15 \* Corresponding author. *E-mail* address: [jinxianliu@gmail.com](mailto:jinxianliu@gmail.com).

16

17 **Abstract**

18 Knowledge of kinship relations between members of wild populations is of great  
19 importance in ecological and conservation genetic studies. The bi-parentally inherited  
20 autosomal markers has been the Golden Standard in kinship analysis. However,  
21 analysis of kin relationship can be challenging in wild populations. The uni-parentally  
22 inherited markers and population demographic information can be helpful for  
23 identifying false-positive in kinship analysis. Here we showed how incorporating  
24 uniparental genetic and demographic information can improve the correct  
25 classification rate of kinship analyses by reanalyzing data of a recent study published  
26 in Science Advances. The application of next generation high-throughput sequencing  
27 to address fundamental ecological questions is of immense benefit to the field of  
28 molecular ecology, which could also generate uniparentally inherited organelle  
29 genomes together with nuclear data. We strongly recommended that uniparental  
30 genetic markers and demographic information be seriously considered in kinship  
31 analyses of wild populations.

32 **Keywords**

33 Kinship analysis, uni-parentally inherited markers, demographic information, wild  
34 populations

35

36 **MAIN TEXT**

37 Knowledge of kinship relations between members of wild populations is of great  
38 importance in ecological and conservation genetic studies with potentially far-  
39 reaching implications (Weir, Anderson, & Hepler, 2006; Blouin, 2003; Flanagan &  
40 Jones, 2019; Speed, & Balding, 2015). Kinship analyses can provide indispensable  
41 information for the study of dispersal (Jasper et al., 2019; Schunter et al., 2014),  
42 mating systems (Bentzen et al., 2001), variance of reproductive success among  
43 individuals (Christie et al. 2010; Liu & Ely 2009), inbreeding avoidance (Hargrove et  
44 al., 2021), kin recognition, and kin selection (O’Corry-Crowe et al., 2020) as well as  
45 aiding the management of endangered populations (Escoda, Fernández-González &  
46 Castresana, 2019; Kanno, Vokoun & Letcher, 2011). However, analysis of kin  
47 relationship can be challenging in wild populations (Weir, Anderson & Hepler, 2006).  
48 Kinship can be estimated on the basis of genetic similarity among individuals of a  
49 population, reflecting the proportion of homologous alleles shared between 2  
50 individuals due to identity-by-descent from a common ancestor (Blouin, 2003).  
51 Estimates of genetic relatedness may be inaccurate because they require the  
52 assumption that founders are outbred and unrelated. High levels of inbreeding may  
53 affect relatedness and therefore kinship inference (Wang, 2014). Even for individuals  
54 whose parents are not inbred, account needs to be taken of 'background relatedness'  
55 that is due to evolutionary history in a population (Weir, Anderson & Hepler, 2006).  
56 So the assessment of kinship among members of wild animal populations is difficult  
57 in the absence of detailed multigenerational pedigrees and background relatedness

58 (Stadele & Vigilant, 2016). Parent-offspring relationships can be determined with  
59 higher confidence than other relationships by comparing the genetic information of an  
60 offspring and supposed parents under the simple Mendel's laws (Flanagan & Jones,  
61 2019). However, it becomes markedly more challenging in situations where neither  
62 parent is known by field observation. In species for which the offspring of unsampled  
63 parents can be expected to contain groups of full and/or half siblings, sibship  
64 reconstruction is a powerful tool for identifying related individuals (Jones et al. 2010).  
65 However, sibship reconstruction for populations with complex kinship structures,  
66 which present in species with promiscuous mating systems, long life spans, and  
67 overlapping generations, can also lead to high error rates (Stadele & Vigilant, 2016).  
68 In addition, genetic data could suffer from a high rate of genotyping errors such as  
69 allelic dropouts and false alleles in situations such as data from low-coverage next-  
70 generation sequencing, noninvasive samples, and highly degraded samples (Blouin  
71 2003; Wang et al. 2019). Use of such data without accounting for mistyping properly  
72 could also lead to inaccurate or incorrect inferences of kin relationships.

73 The bi-parentally inherited autosomal markers, e.g. SNPs or microsatellites, has  
74 been the Golden Standard in kinship analysis because of their high discriminatory  
75 power in kinship inference (Goudet et al., 2018; Weinman, Solomon & Rubenstein,  
76 2015). The uni-parentally inherited (sex-specific inherited) markers are usually  
77 applied to cases where autosomal genotypes cannot be obtained due to technical  
78 constraints. The disadvantage of uniparental markers is that their profiles are usually  
79 not individual specific, resulting in a much lower discrimination power (Kayser,

80 2007). The uniparental markers yields limited information compared with autosomal  
81 markers and does not allow one to obtain a complete reconstruction of possible kin  
82 relationships (Vai et al., 2020). However, the inheritance patterns of the uniparentally  
83 inherited markers make them powerful additions to kinship analyses using bi-  
84 parentally inherited autosomal data by clearly identifying false-positive assignments  
85 of kinship with Mendelian incompatibilities (Kopps et al., 2015). For example,  
86 individuals not sharing their maternally inherited haplotypes could not be assigned to  
87 the category full sibs even if they had high likelihood. In addition to genetic data,  
88 demographic information can also be helpful for identifying false-positive. For  
89 example, individuals of different age class could not be assigned to the category full  
90 sibs.

91 High-throughput next-generation sequencing platforms can generate high-density  
92 genome-wide data in a relatively short time and at an affordable price. With rapidly  
93 increasing applications of genome-wide SNPs in model and non-model species, dense  
94 markers has been used in kinship analyses of wild populations by taking advantage of  
95 the high informative power (Escoda, Fernández-González & Castresana, 2019; Jasper  
96 et al., 2019; Martin, Lipps & Gibbs, 2021). Next-generation sequencing projects can  
97 also generate organelle DNA in addition to nuclear DNA, which makes the sequence  
98 analysis of entire organelle genomes feasible for kinship analyses (Al-Nakeeb et al.  
99 2017). Although the use of high-density, genome-wide molecular markers can enable  
100 reasonably accurate assignment of individuals to high-order groupings (Goudet et al.,  
101 2018; Phillips, García-Magariños, Salas, Carracedo & Lareu, 2012), the organelle

102 DNA sequences generated together by next-generation sequencing platforms could be  
103 expected to provide a nice chance to excluded some false-positive results. To  
104 illustrate how incorporating demographic and uniparental genetic information can  
105 improve the correct classification rate of kinship analyses, here we reanalyzed the  
106 data of a recent study (Vendramli et al. 2021) published in Science Advances by  
107 incorporating the maternally inherited mitochondrial DNA and age information.

108       Based on sibship reconstruction and simulation analyses, Vendramli et al. (2021)  
109 reported an extreme reproductive sweepstake event together with collective larval  
110 dispersal in the highly abundant shallow water Antarctic limpet, *Nacella concinna*,  
111 with which they explained the chaotic genetic patchiness observed in the Rose Garden  
112 1999. Vendramli et al. (2021) draw their conclusions under a complete open  
113 population frame, which implies that the recruitment of local populations of *N.*  
114 *concinna* were exclusively from other sources. Based on the results of sibship  
115 reconstruction, their forward genetic simulations implicated the Rose Garden 1999  
116 age class most likely originated from an extreme sweepstake reproductive success of a  
117 single female residing within one stack in an unknown source population. Then at  
118 least 95% of the offspring from the extreme reproductive sweepstake in the source  
119 population dispersed collectively to Rose Garden. The findings were quite intriguing,  
120 however, both the extreme sweepstake reproductive success and strong collective  
121 dispersal are only theoretically sound from their forward simulations. For organisms  
122 with great fecundity and high mortality in early life stages, the need to match  
123 reproductive activity with environmental conditions conducive to spawning,  
124 fertilization, larval development and recruitment may result in extreme variance in  
125 reproductive success among individuals (Hedgercock & Pudovkin, 2011). Inherent to

126 the sweepstake reproductive success hypothesis is the idea that variance in  
127 reproductive success among breeders is extremely high. However, spawning of *N.*  
128 *concinna* is highly synchronous among all breeding adults in a given population and  
129 occurs in a very narrow timeframe no longer than 24 hours (Picken & Allan, 1983;  
130 Stanwell-Smith & Clarke, 1998). The larvae produced by the breeding group of a  
131 specific population during such a short period of time may form a single cohort and  
132 meet similar environmental conditions, which apparently does not facilitate the  
133 occurrence of extreme variance in reproductive success among individuals.  
134 Furthermore, larvae transported far from natal populations by ocean currents usually  
135 suffer high mortality along the way (Becker, Levin, Fodrie, & McMillan, 2007;  
136 Thorson, 1950). So successful recruitment of most larvae to Rose Garden from the  
137 extreme reproductive sweepstake in an unknown source population via collective  
138 dispersal with low mortality could be logistically challenging.

139       If the Rose Garden 1999 sample were originated from an extreme sweepstake  
140 reproductive success of a single female as suggested, the haplotype diversity of  
141 maternally inherited mitochondrial sequences for the Rose Garden 1999 sample  
142 should be extremely lower than those in other populations. More specifically, only  
143 one mitochondrial haplotype shared by the offspring of the single super **female** should  
144 be expected in Rose Garden 1999. The Restriction site-associated DNA sequencing  
145 (RAD-seq) conducted in the original study (Vendrami et al., 2021) was performed on  
146 both nuclear and mitochondrial genome simultaneously. There are two Eco RI  
147 recognition sites in the complete, 16761 base pairs long, mitochondrial genome of *N.*  
148 *concinna* (GenBank accession: KT990126.1), at nucleotide positions from 10645 to  
149 10650 and from 14984 to 14989 respectively. However, authors of the original study

150 ignored the mitochondrial sequences in their data, which could validate their  
151 conclusion of the extreme sweepstake reproductive success directly.

152 Here we tested a specific prediction of the extreme sweepstake reproductive  
153 success proposed in Vendramli et al. (2021), sharing of a single mitochondrial  
154 haplotype by the offspring of the single reproductive successful female. The clean  
155 paired-end reads of each individual were mapped to the reference mitochondrial  
156 genome. After removing contaminated and low-quality individual dataset, consensus  
157 haploid mitochondrial sequence was called for 132 individuals from 14 samples. We  
158 got two fragments of mitochondrial sequences with a total length of 1645 base pairs  
159 corresponding to the two Eco RI recognition sites. One fragment corresponds to  
160 10235-11066 in the reference mitochondrial genome including partial ND1, tRNA-  
161 Leu and partial 16S ribosomal RNA. The other fragment corresponds to 14568-15380  
162 of the reference mitochondrial genome including partial COX3, tRNA-Arg, tRNA-  
163 Asn, and partial ND3. In addition, a third Eco RI recognition site originating from a C  
164 to T transition at 6384 of the mitochondrial genome changing GAACTC to GAATTC  
165 was also detected in six individuals. The average depth of coverage per nucleotide  
166 position of the 1645 bp per individual ranged from 42 X to 443 X and were larger than  
167 100 X for most (121/91%) individuals, consistent with the high copy number of  
168 mitochondrial genome per cell (Table S1). Comparison of the 132 mitochondrial  
169 sequences revealed 20 distinct haplotypes defined by 22 polymorphic sites with 19  
170 transitions, and 3 single-base deletions (Table S2). Most of the haplotypes (12/60%)  
171 were singletons represented by only a single individual. The remaining eight  
172 haplotypes were shared by multiple populations (Table S3). The median-joining  
173 network of the 20 haplotypes observed revealed a shallow star-like topology with a  
174 dominant haplotype H1 (68 individuals, ~53%) in the center (Fig. 1), suggesting a



175 shallow phylogeographic history, which was consistent with previous study with a  
176 partial fragment of the COI gene in the western Antarctic Peninsula (González-  
177 Wevar, David, & Poulin, 2011). The number of haplotypes observed per population  
178 ranged from 3 in four samples (EB15, RG99, Do 99, and SI99) to 7 in RG15. The  
179 haplotype diversity ( $h$ ) per population ranged from 0.38 in EB15 to 0.93 in RG15  
180 (Table 1). Low levels of nucleotide diversity were detected in all localities.

181 In contrast to the extreme sweepstake reproductive success claimed in the  
182 original study (Vendrami et al., 2021) in the Rose Garden 1999, three mitochondrial  
183 haplotypes were detected in only nine individuals of the Rose Garden 1999 sample by  
184 using the 1646 base pairs of mitochondrial sequences. Six of the nine individuals were  
185 found with the most dominant haplotype H1 that shared by 68 individuals among all  
186 the populations. Two individuals were found with a subdominant haplotype H19  
187 shared by three individuals from Ryder Bay. The last individual was detected with  
188 another subdominant haplotype H8 shared by seven individuals from five individuals.  
189 If each of the three mitochondrial haplotypes detected corresponded to one spawning  
190 female, then at least three females had contributed to the recruitment of the Rose  
191 Garden 1999 cohort. However, considering that all the three haplotypes were  
192 dominant or subdominant ones, it is highly possible that the individuals shared the  
193 same mitochondrial haplotype in the Rose Garden 1999 sample could be offspring of  
194 different spawning females with the same dominant or subdominant haplotype, as  
195 evidenced in other samples with unrelated individuals but shared haplotypes.  
196 Furthermore, the three haplotypes were detected with only nine individuals of the  
197 highly abundant *N. concinna* and with partial mitochondrial sequences of 1646 base  
198 pairs, which is only about one tenth of the whole mitochondrial genome. If more  
199 individuals and more sequences of the mitochondrial genome (e.g. whole

200 mitochondrial genome) were analyzed, it could be of high probability that more  
201 mitochondrial haplotypes could be found in the Rose Garden 1999 cohort. Indeed,  
202 previous research with a partial fragment (663 bp) of the mitochondrial COI gene,  
203 which was not targeted by the RAD-Seq in Vendramli et al. (Vendrami et al., 2021),  
204 for populations of *N. concinna* in the western Antarctic Peninsula revealed 16  
205 haplotypes among 160 individuals, indicating informative polymorphisms in other  
206 parts of the mitochondrial genome and possibly higher haplotype diversity  
207 considering more mitochondrial sequences (González-Wevar et al., 2011).

208       Clearly, by analyzing the maternally inherited mitochondrial sequences in the  
209 original RAD-Seq data of Vendramli et al. (2021), the number and distribution of  
210 mitochondrial haplotypes in the Rose Garden 1999 cohort indicated that multiple  
211 spawning females, at least three and highly possible many more, had contributed to  
212 the recruitment the Rose Garden 1999 age class. Clearly, the extreme sweepstake  
213 reproductive success claimed by Vendramli et al. (2021) for the Rose Garden 1999  
214 cohort was not supported by the maternally inherited mitochondrial sequences in their  
215 own dataset, let alone the collective dispersal of larvae from the extreme sweepstake  
216 reproductive success in a source population.

217       The important evidence supporting an extreme sweepstake event in Vendramli et  
218 al. (2021) is that Rose Garden in 1999 was exclusively represented by full- and half-  
219 siblings, which was assessed based on the relatedness coefficients. Any relatedness  
220 between individuals occurs against a background level of relatedness in the  
221 population, either as a consequence of inbreeding or by belonging to the same  
222 population (Weir, Anderson, & Hepler, 2006). However, some relatedness measures  
223 for use with molecular data assume that the individuals themselves are not inbred, as  
224 the approach (Manichaikul et al., 2010) that adopted by Vendramli et al. (2021).

225 Given that the mitochondrial data did not support the sweepstake hypothesis, the close  
226 kinships assessed among individuals in the Rose Garden 1999 cohort could possibly  
227 reflect a background relatedness resulting from high degree of inbreeding, the mating  
228 of individuals closely related by ancestry. Vendramli et al. (2021) explained the  
229 chaotic genetic patchiness in the Rose Garden 1999 cohort with an extreme  
230 sweepstake reproductive success that supported by a suite of correlated genomic  
231 signatures including locally reduced genetic diversity, substantially elevated genomic  
232 relatedness, and locally elevated linkage disequilibrium. However, inbreeding can  
233 also be expected to lead to low polymorphism, extensive linkage disequilibrium, low  
234 effective population size, and high population subdivision (Charlesworth, 2003).  
235 Indeed, the number of mitochondrial haplotypes, haplotype diversity, and nucleotide  
236 diversity were lower in the Rose Garden 1999 sample than in the Rose Garden 2015  
237 sample, suggesting signals of possible inbreeding.

238 Furthermore, a critical prerequisite for the extreme sweepstake reproductive  
239 success that proposed by Vendramli et al. (2021) is that all the limpets analyzed in  
240 Rose Garden 1999 were from the same age cohort. To ensure that, Vendramli et al.  
241 restricted their sampling to limpets with shells between 20 and 30 mm, which they  
242 thought corresponded to animals approximately 10 years of age. However, typical of  
243 polar marine invertebrates, growth rate for *N. concinna* is slow, which makes it  
244 difficult to follow the growth of individual cohorts or year classes (Clarke, Prothero-  
245 Thomas, Beaumont, Chapman, & Brey, 2004; Picken, 1980). A previous study found  
246 that the most abundant size group of *Nacella concinna* comprised individuals with  
247 sizes from 20 to 30 mm, and the von Bertalanffy growth curve demonstrated that  
248 individuals with shell size from 20 to 30 mm included multiple age classes (Brêthes,  
249 Ferreyra, & de la Vega, 1994). Furthermore, the annual shell growth derived from

250 mark and recapture techniques was slow, with annual increment less than 3 mm for  
251 most individuals with shell size from 20 to 30 mm (Clarke et al., 2004). Based on all  
252 these evidences, it was highly possible that multiple age cohorts might exist among  
253 individuals of *N. concinna* with shell size between 20 and 30 mm. So the so-called  
254 full- and half-siblings observed in Rose Garden 1999 by Vendramli et al. (2021)  
255 might only reflect close relatedness among individuals, but not real full- and half-  
256 siblings as suggested.

257 By incorporating demographic and uniparental genetic information, our results  
258 did not support sweepstake reproductive success and collective dispersal in the Rose  
259 Garden 1999 sample of *N. concinna*. Similarly, cohesive dispersal over extensive  
260 periods (4–6 month) was also suggested in the splitnose rockfish (*Sebastes diploproa*)  
261 by genetic relatedness analysis with nuclear microsatellites, which indicated that  
262 11.6% of the recruits were siblings in a single recruitment pulse (Ottmann et al.,  
263 2016). However, further sequencing of the mitochondrial control region demonstrated  
264 that the juvenile samples consisted two different rockfish species, which inflated  
265 estimates of relatedness within dyads containing individuals from the same species  
266 (Ottmann et al., 2017). Thus, the original analysis with microsatellite data did not  
267 have evidence to support the long-term cohesive dispersal as claimed.

268 In summary, although bi-parental genetic markers play the major role in kinship  
269 analysis, incorporating demographic and uniparental genetic information can improve  
270 the correct classification rate of kinship analyses by reducing false positives. The  
271 application of next generation high-throughput sequencing to address fundamental  
272 ecological questions is of immense benefit to the field of molecular ecology.  
273 Although theoretically, even distant kin relationships can be accurately classified

274 when a large number of markers, linkage information, or whole-genome sequence  
275 data can be attained (Kling et al., 2012; Li et al., 2014), our results suggested that  
276 misclassification can still happen due to complex background of wild populations.  
277 Since the sequences of uniparental organelle DNA could be routinely generated  
278 together with nuclear DNA by the next generation high-throughput sequencing, we  
279 strongly recommended that these uniparental genetic information be seriously  
280 considered in kinship analyses of wild populations. In particular, because of its high  
281 abundance in cells, the assembly of organelle genomes can be obtained even with  
282 only low-coverage next generation sequencing data (Rasheed et al., 2017), which  
283 could be of particular importance for kinship studies with low-coverage NGS data,  
284 where genotyping error and misclassification rate could be high (Wang et al. 2019). In  
285 addition, knowledge of population demographic information such as age and sex are  
286 also very important in kinship analyses, even in the genomic era.

287

## 288 **Acknowledgements**

289 **Funding:** This work was supported by the National Natural Science Foundation of  
290 China (NSFC) (No. 31970488).

291 **Competing interests:** The authors declare that they have no competing interests.

292

293

## 294 **References**

- 295 Al-Nakeeb, K., Petersen, T., & Sicheritz-Pontén, T. (2017). Norgal: extraction and de  
296 novo assembly of mitochondrial DNA from whole-genome sequencing data.  
297 *BMC Bioinformatics* 18, 510.
- 298 Becker, B. J., Levin, L. A., Fodrie, F. J., & McMillan, P. A. (2007). Complex larval  
299 connectivity patterns among marine invertebrate populations. *Proc Natl Acad Sci*  
300 *U S A*, 104(9), 3267-3272. doi:10.1073/pnas.0611651104
- 301 Bentzen, P., Olsen, J.B., McLean, J.E., Seamons, T.R., & Quinn, T.P. (2001). Kinship

- 302 analysis of Pacific salmon: insights into mating, homing, and timing of  
303 reproduction. *J. Hered.* 92(2), 127–136.
- 304 Blouin, M. S. (2003). DNA-based methods for pedigree reconstruction and kinship  
305 analysis in natural populations. *Trends Ecol. Evol.* 18, 503–511.
- 306 Brêthes, J. C., Ferreyra, G., & de la Vega, S. (1994). Distribution, growth and  
307 reproduction of the limpet *Nacella (Patinigera) concinna* (Strebel 1908) in  
308 relation to potential food availability, in Esperanza Bay (Antarctic Peninsula).  
309 *Polar Biology*, 14(3), 161-170. doi:10.1007/bf00240521
- 310 Charlesworth, D. (2003). Effects of inbreeding on the genetic diversity of populations.  
311 *Philos Trans R Soc Lond B Biol Sci*, 358(1434), 1051-1070.  
312 doi:10.1098/rstb.2003.1296
- 313 Christie, M. R., Johnson, D. W., Stallings, C. D., & Hixon, M. A. (2010). Self-  
314 recruitment and sweepstakes reproduction amid extensive gene flow in a coral-  
315 reef fish. *Mol Ecol*, 19(5), 1042-1057. doi:10.1111/j.1365-294X.2010.04524.x
- 316 Clarke, A., Prothero-Thomas, E., Beaumont, J., Chapman, A., & Brey, T. (2004).  
317 Growth in the limpet *Nacella concinna* from contrasting sites in Antarctica. *Polar*  
318 *Biology*. doi:10.1007/s00300-004-0647-8
- 319 Escoda, L., Fernández-González, Á., & Castresana, J. (2019). Quantitative analysis of  
320 connectivity in populations of a semi-aquatic mammal using kinship categories  
321 and network assortativity. *Molecular Ecology Resources*, 19(2), 310–326.  
322 <https://doi.org/10.1111/1755-0998.12967>
- 323 Flanagan, S. P., & Jones, A. G. (2019). The future of parentage analysis: From  
324 microsatellites to SNPs and beyond. *Molecular Ecology*, 28(3), 544–567.  
325 <https://doi.org/10.1111/mec.14988>
- 326 González-Wevar, C. A., David, B., & Poulin, E. (2011). Phylogeography and  
327 demographic inference in *Nacella (Patinigera) concinna* (Strebel, 1908) in the  
328 western Antarctic Peninsula. *Deep Sea Research Part II: Topical Studies in*  
329 *Oceanography*, 58(1-2), 220-229. doi:10.1016/j.dsr2.2010.05.026
- 330 Goudet, J., Kay, T., & Weir, B.S. (2018) How to estimate kinship. *Molecular Ecology*  
331 27, 4121-4135.
- 332 Hargrove, J. S., McCane, J., Roth, C. J., High, B., & Campbell, M. R. (2021). Mating  
333 systems and predictors of relative reproductive success in a Cutthroat Trout  
334 subspecies of conservation concern. *Ecology and evolution*, 11(16), 11295–  
335 11309. <https://doi.org/10.1002/ece3.7914>
- 336 Hedgecock, D., & Pudovkin, A. I. (2011). Sweepstakes Reproductive Success in  
337 Highly Fecund Marine Fish and Shellfish: A Review and Commentary. *Bulletin*  
338 *of marine science*, 87(4), 971-1002. doi:10.5343/bms.2010.1051
- 339 Jasper, M., Schmidt, T. L., Ahmad, N. W., Sinkins, S. P., & Hoffmann, A. A. (2019). A  
340 genomic approach to inferring kinship reveals limited intergenerational dispersal  
341 in the yellow fever mosquito. *Molecular Ecology Resources*, 19(5), 1254–1264.  
342 <https://doi.org/10.1111/1755-0998.13043>
- 343 Jones, A. G., Small, C. M., Paczolt, K. A., & Ratterman, N. L. (2010). A practical  
344 guide to methods of parentage analysis. *Molecular Ecology Resources*, 10(1), 6–  
345 30. <https://doi.org/10.1111/j.1755-0998.2009.02778.x>

- 346 Kanno, Y., Vokoun, J. C., & Letcher, B. H. (2011). Sibship reconstruction for  
347 inferring mating systems, dispersal and effective population size in headwater  
348 brook trout (*Salvelinus fontinalis*) populations. *Conservation Genetics*, 12(3),  
349 619–628. [10.1007/s10592-010-0166-9](https://doi.org/10.1007/s10592-010-0166-9)
- 350 Kayser, M. (2007). Uni-parental markers in human identity testing including forensic  
351 DNA analysis. *BioTechniques*, 43(6), p. Sxv-Sxxi. doi: 10.2144/000112580.
- 352 Kling, D., J. Welander, A. Tillmar, Ø. Skare, T. Egeland, & G. Holmlund. (2012).  
353 DNA microarray as a tool in establishing genetic relatedness – current status and  
354 future prospects. *Forensic Sci. Int. Genet.* 6:322–329.
- 355 Kopps, A. M., Kang, J., Sherwin, W. B., & Palsboll P. J. (2015). How well do  
356 molecular and pedigree relatedness correspond, in populations with diverse  
357 mating systems, and various types and quantities of molecular and demographic  
358 data? *G3* 5:1815–1826.
- 359 Li, H., Glusman, G., Huff, C., Caballero, J., & Roach, J. C. (2014). Accurate and  
360 robust prediction of genetic relationship from whole-genome sequences. *PLoS*  
361 *One*, 9,1–6.
- 362 Liu, J., & Ely, B. (2009). Sibship reconstruction demonstrates the extremely low  
363 effective population size of striped bass *Morone saxatilis* in the Santee-Cooper  
364 system, South Carolina, USA. *Molecular Ecology*, 18, 4112–4120.
- 365 Manichaikul, A., Mychaleckyj, J. C., Rich, S. S., Daly, K., Sale, M., & Chen, W. M.  
366 (2010). Robust relationship inference in genome-wide association studies.  
367 *Bioinformatics*, 26(22), 2867–2873. doi:10.1093/bioinformatics/btq559
- 368 Martin, S. A., Lipps, G. J. Jr, & Gibbs, H. L. (2021). Pedigree-based assessment of  
369 recent population connectivity in a threatened rattlesnake. *Molecular Ecology*  
370 *Resources*, 21, 1820– 1832. <https://doi.org/10.1111/1755-0998.13383>
- 371 O’Corry-Crowe, G., Suydam, R., Quakenbush, L. et al. (2020). Group structure and  
372 kinship in beluga whale societies. *Scientific Reports*, 10, 11462  
373 <https://doi.org/10.1038/s41598-020-67314-w>
- 374 Ottmann, D., Grorud-Colvert, K., Sard, N. M., Huntington, B. E., Banks, M. A., &  
375 Sponaugle, S. (2016). Long-term aggregation of larval fish siblings during  
376 dispersal along an open coast. *Proc Natl Acad Sci.*, 113, 14067–14072.
- 377 Ottmann, D., Grorud-Colvert, K., Sard, N. M., Huntington, B. E., Banks, M. A., &  
378 Sponaugle, S. (2017). Retraction for Ottmann et al., Long-term aggregation of  
379 larval fish siblings during dispersal along an open coast. *Proc Natl Acad Sci.*, 114  
380 (52) <https://doi.org/10.1073/pnas.1720656115>
- 381 Phillips, C., García-Magariños, M., Salas, A., Carracedo, A., & Lareu, M. V. (2012).  
382 SNPs as supplements in simple kinship analysis or as core markers in distant  
383 pairwise relationship tests: when do SNPS add value or replace well-established  
384 and powerful STR tests? *Transfusion Medicine and Hemotherapy*, 39(3), 202–  
385 210. <https://doi.org/10.1159/000338857>
- 386 Picken, G. B. (1980). The distribution, growth, and reproduction of the Antarctic  
387 limpet *Nacella (Patinigera) concinna* (Strebel, 1908). *Journal of Experimental*  
388 *Marine Biology and Ecology*, 42(1), 71–85. doi:10.1016/0022-0981(80)90167-7
- 389 Picken, G. B., & Allan, D. (1983). Unique spawning behaviour by the Antarctic

- 390 limpet *Nacella (Patinigera) concinna* (Strebel, 1908). *Journal of Experimental*  
391 *Marine Biology and Ecology*, 71(3), 283-287. doi:10.1016/0022-0981(83)90121-  
392 1
- 393 Rasheed, A., Hao, Y., Xia, X., Khan, A., Xu, Y., Varshney, R. K., & He, Z. J. M.  
394 (2017). Crop breeding chips and genotyping platforms: progress, challenges, and  
395 perspectives. *Mol Plant*, 10, 1047-1064.
- 396 Schunter, C., Pascual, M., Garza, J. C., Raventos, N., & Macpherson, E. (2014).  
397 Kinship analyses identify fish dispersal events on a temperate coastline.  
398 *Proceedings. Biological sciences*, 281(1785), 20140556.  
399 <https://doi.org/10.1098/rspb.2014.0556>
- 400 Speed, D., & Balding, D. J. (2015). Relatedness in the post-genomic era: Is it still  
401 useful? *Nature Reviews Genetics*, 16, 33–44.
- 402 Stadele, V., & Vigilant, L. (2016). Strategies for determining kinship in wild  
403 populations using genetic data. *Ecol Evol*, 6(17), 6107-6120.  
404 doi:10.1002/ece3.2346
- 405 Stanwell-Smith, D., & Clarke, A. (1998). The Timing of reproduction in the Antarctic  
406 limpet *Nacella concinna* (strebel, 1908) (Patellidae) at Signy Island, in relation to  
407 environmental variables. *Journal of Molluscan Studies*, 64(1), 123-127.  
408 doi:10.1093/mollus/64.1.123
- 409 Thorson, G. (1950). Reproductive and larval ecology of marine bottom invertebrates.  
410 *Biol Rev Camb Philos Soc*, 25(1), 1-45. doi:10.1111/j.1469-185x.1950.tb00585.x
- 411 Vai, S., Amorim, C. E. G., Lari, M., & Caramelli, D. (2020). Kinship determination in  
412 archeological contexts through DNA analysis. *Frontiers in Ecology*, 8, 83,  
413 <https://doi.org/10.3389/fevo.2020.00083>
- 414 Vendrami, D. L. J., Peck, L. S., Clark, M. S., Eldon, B., Meredith, M., & Hoffman, J.  
415 I. (2021). Sweepstake reproductive success and collective dispersal produce  
416 chaotic genetic patchiness in a broadcast spawner. *Sci Adv*, 7(37), eabj4713.  
417 doi:10.1126/sciadv.abj4713
- 418 Wang, J. (2014). Marker-based estimates of relatedness and inbreeding coefficients:  
419 An assessment of current methods. *Journal of Evolutionary Biology*, 27(3), 518–  
420 530.
- 421 Wang, J. (2019). Pedigree reconstruction from poor quality genotype data. *Heredity*,  
422 122, 719–728. <https://doi.org/10.1038/s41437-018-0178-7>
- 423 Weinman, L. R., Solomon, J. W., & Rubenstein, D. R. (2015). A comparison of single  
424 nucleotide polymorphism and microsatellite markers for analysis of parentage  
425 and kinship in a cooperatively breeding bird. *Molecular Ecology Resources*, 15,  
426 502– 511.
- 427 Weir, B. S., Anderson, A. D., & Hepler, A. B. (2006). Genetic relatedness analysis:  
428 modern data and new challenges. *Nature Reviews Genetics*, 7(10), 771-780.  
429 doi:10.1038/nrg1960
- 430
- 431 **Data availability:** Data are available in the original paper (3), The BAM files used  
432 for consensus sequences extraction and the aligned FASTA file of the sequences  
433 analyzed in this study are available at figshare: <https://10.6084/m9.figshare.16937386>.



434

435 **Author contributions:** J-X.L. supervised the study. M-Y.L. and J-X.L. analyzed the  
436 data, J-X.L. wrote the manuscript with contribution of M-Y.L..

437

438 **Supplementary materials:** This manuscript has supplementary materials with details  
439 of Materials and Methods and supplementary tables.

440 **Figures and Tables**

441 **Fig. 1. Median-joining network for 20 mt haplotypes of *Nacella concinna*.**  
442 Haplotypes are represented by circles, the sizes of which are proportional to the  
443 number of individuals. Different colors represent geographic distribution. Mutational  
444 steps between haplotypes are indicated by hatch marks

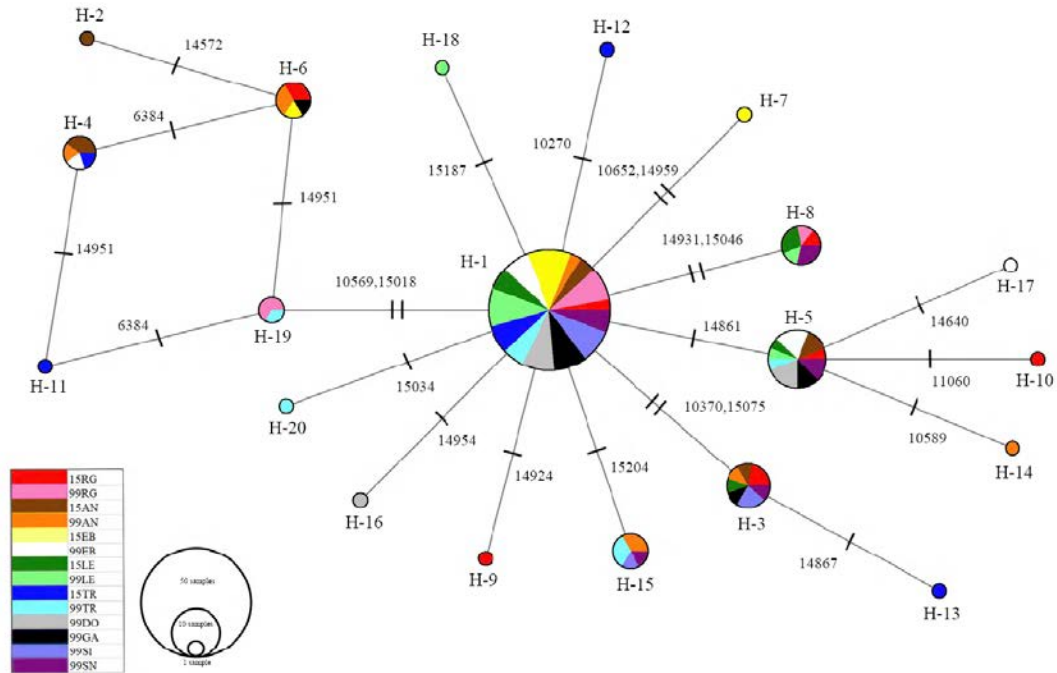

| <b>Locality</b> | <b><i>N</i></b> | <b><i>k</i></b> | <b><i>H</i></b> | <b>π</b> | <b><i>S</i></b> | <b><i>I</i></b> |
|-----------------|-----------------|-----------------|-----------------|----------|-----------------|-----------------|
| RG15            | 10              | 7               | 0.93            | 0.00157  | 9               | 1               |
| RG99            | 9               | 3               | 0.56            | 0.00074  | 4               | 0               |
| AN15            | 9               | 5               | 0.86            | 0.00149  | 7               | 1               |
| AN99            | 9               | 6               | 0.92            | 0.00152  | 8               | 1               |
| EB15            | 10              | 3               | 0.38            | 0.00024  | 2               | 3               |
| EB99            | 10              | 4               | 0.71            | 0.00081  | 5               | 1               |
| LE15            | 8               | 4               | 0.75            | 0.00098  | 5               | 0               |
| LE99            | 10              | 4               | 0.53            | 0.00049  | 4               | 0               |
| TR15            | 9               | 5               | 0.72            | 0.00125  | 7               | 1               |
| TR99            | 9               | 5               | 0.81            | 0.00078  | 5               | 0               |
| DO99            | 10              | 3               | 0.60            | 0.00041  | 2               | 0               |
| GA99            | 10              | 4               | 0.64            | 0.00070  | 5               | 1               |
| SI99            | 9               | 3               | 0.56            | 0.00061  | 3               | 0               |
| SN99            | 10              | 5               | 0.82            | 0.00101  | 6               | 0               |

447

448 **Table 1.** Summary of genetic diversity indices for samples of *Nacella concinna*. *N*:  
449 number of sampled specimens; *k*: number of haplotypes detected; *H*: haplotype  
450 diversity; π: nucleotide diversity; *S*: polymorphic sites; *I*: number of indels.
